# Supplementary material
Source: PubMed Central journal article supplement (PMC8284599)
Supplement: mmc1.pdf [file mmc1.pdf]

**Supplemental information**

**Distinct immunological signatures**

**discriminate severe COVID-19**

**from non-SARS-CoV-2-driven critical pneumonia**

**Stefanie Kreutmair, Susanne Unger, Nicolás Gonzalo Núñez, Florian Ingelfinger, Chiara Alberti, Donatella De Feo, Sinduya Krishnarajah, Manuel Kauffmann, Ekaterina Friebel, Sepideh Babaei, Benjamin Gaborit, Mirjam Lutz, Nicole Puertas Jurado, Nisar P. Malek, Siri Goepel, Peter Rosenberger, Helene A. Häberle, Ikram Ayoub, Sally Al-Hajj, Jakob Nilsson, Manfred Claassen, Roland Liblau, Guillaume Martin-Blondel, Michael Bitzer, Antoine Roquilly, and Burkhard Becher**

# Figure S1

## A

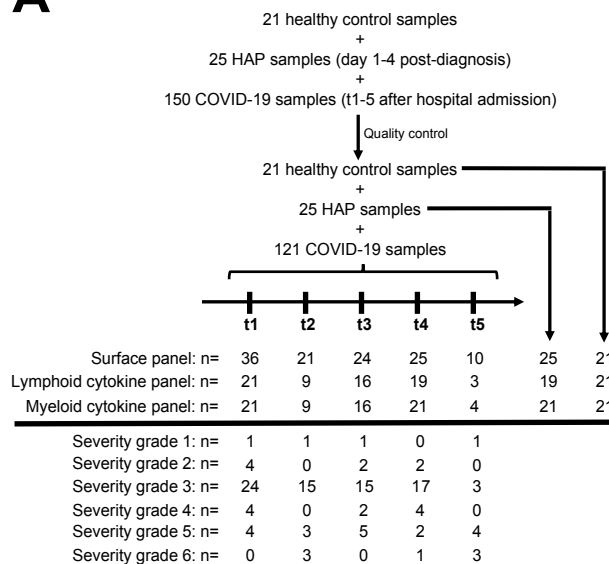

## B

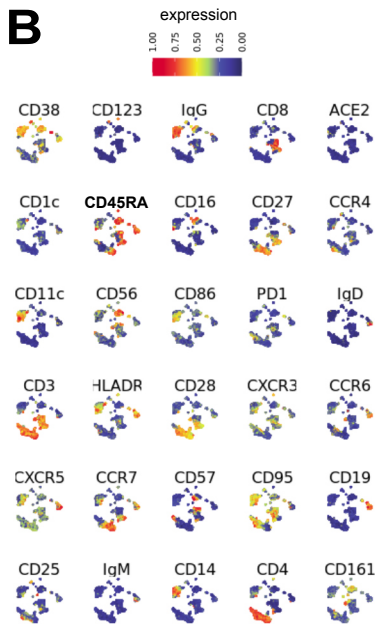

## C

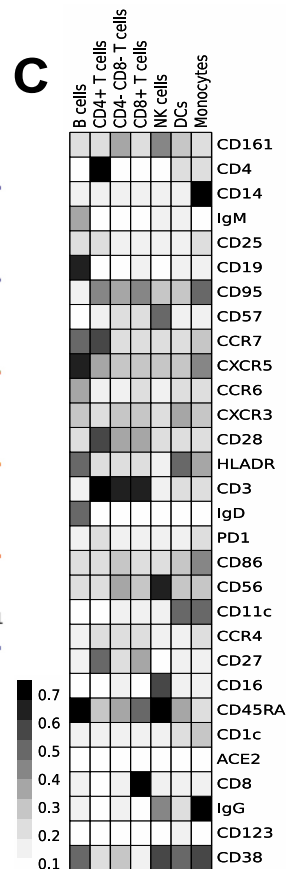

## D

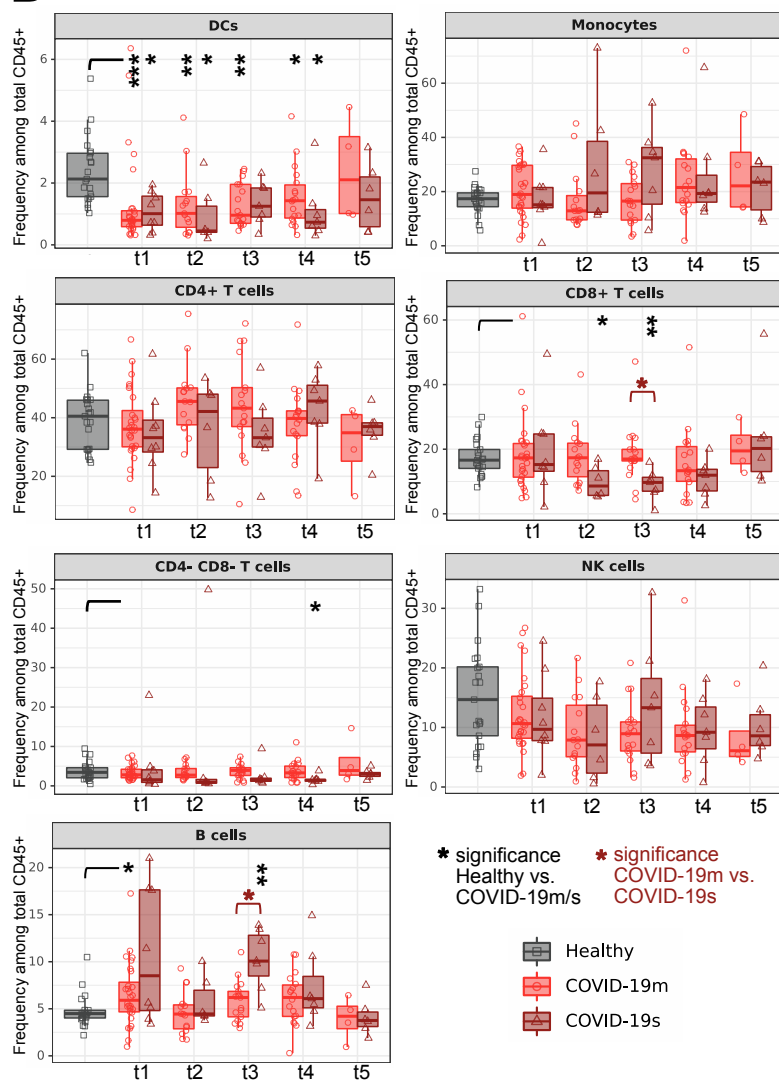

## E

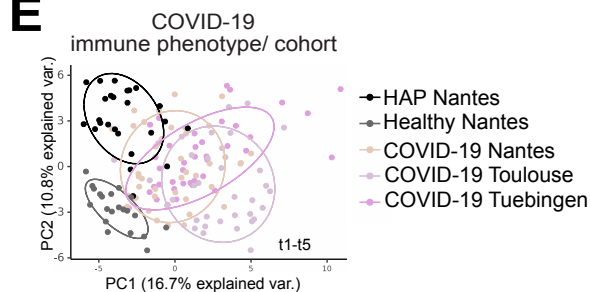

## F

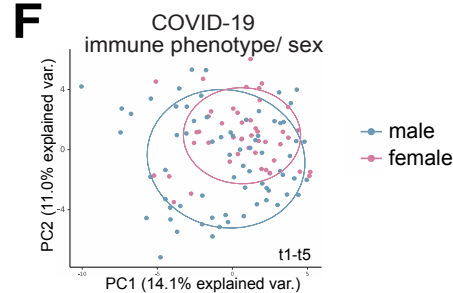

## G

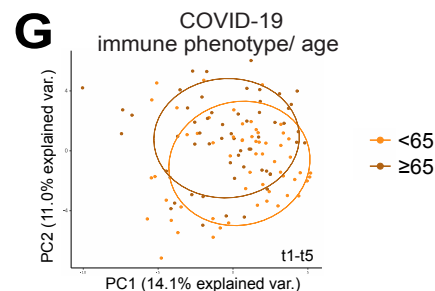

# Figure S2

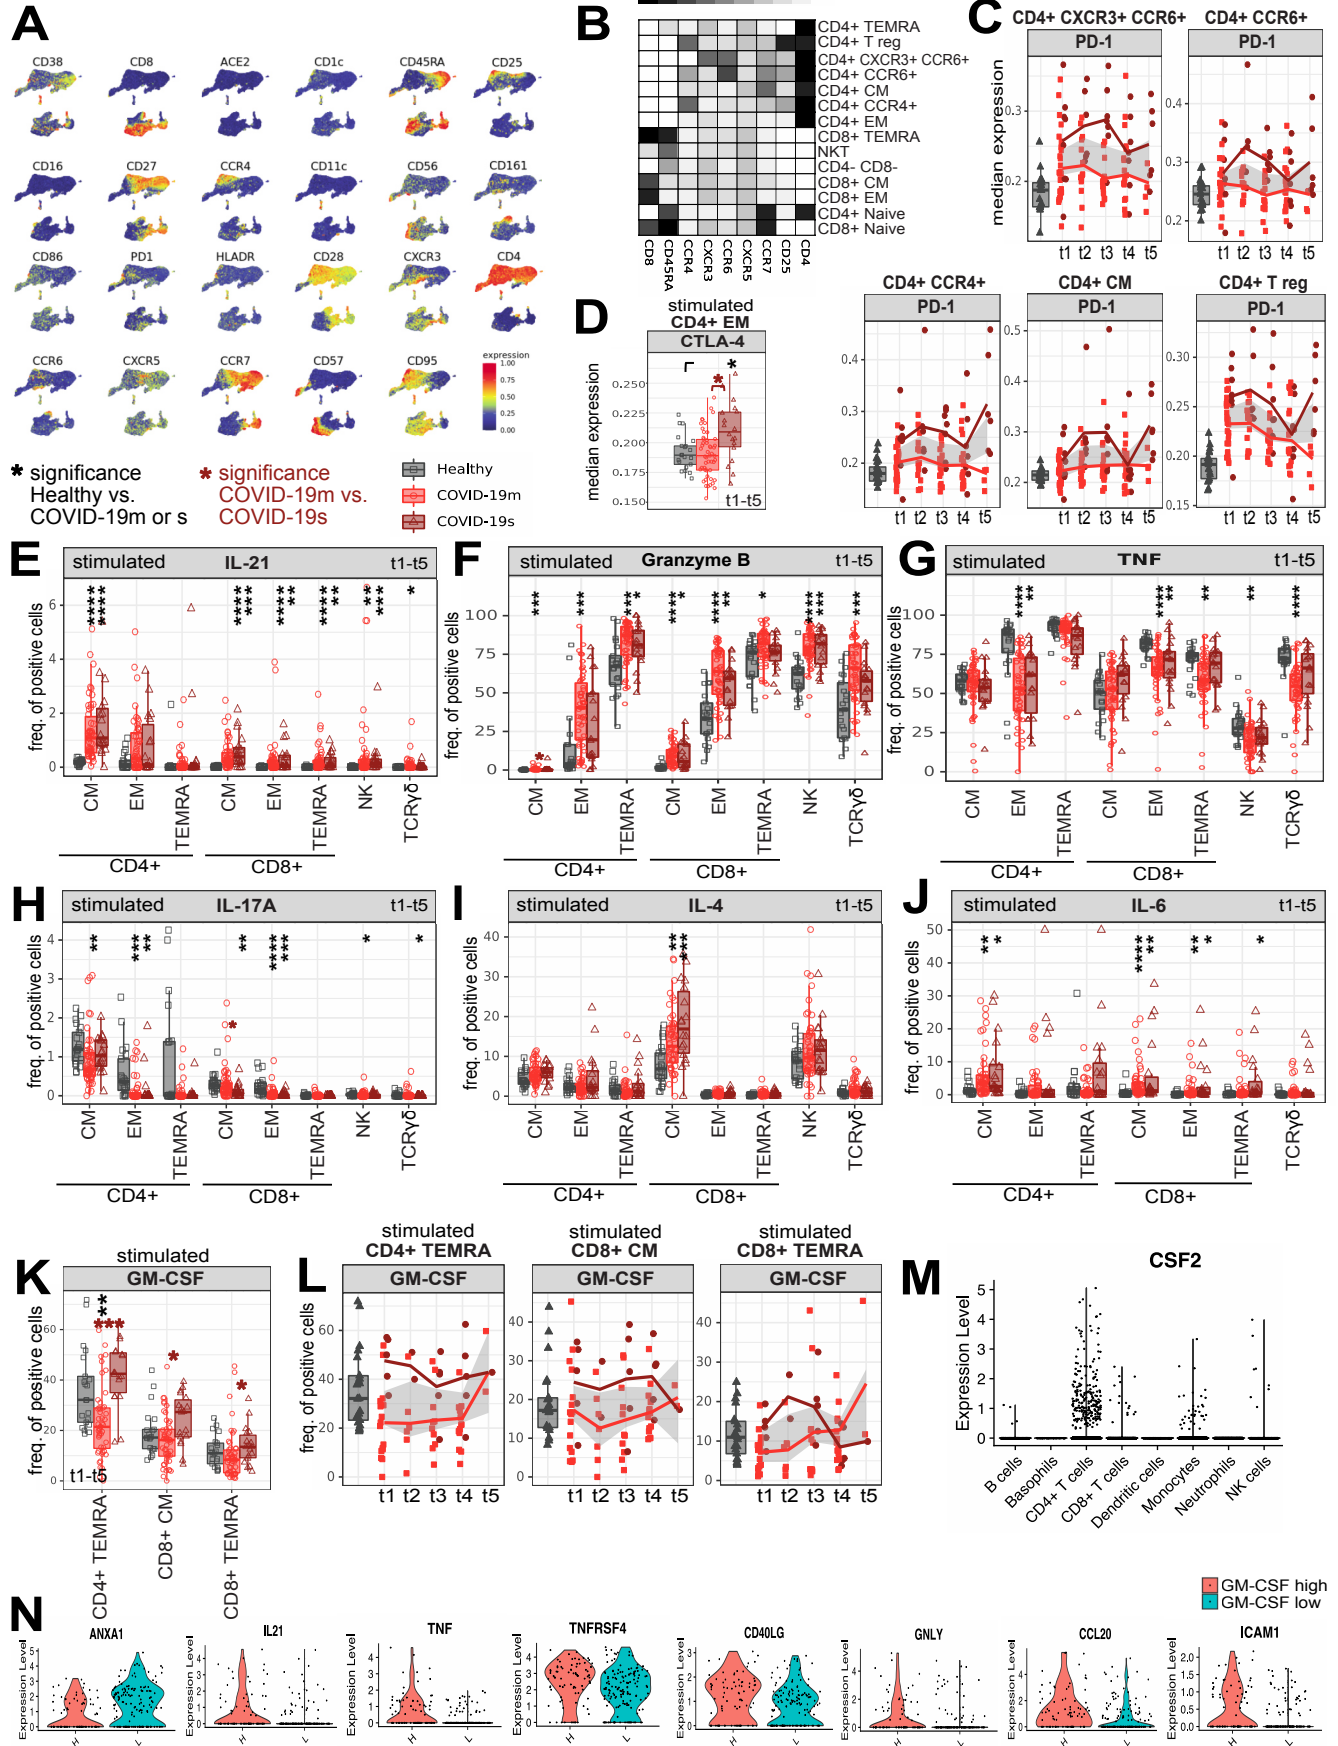

# Figure S3

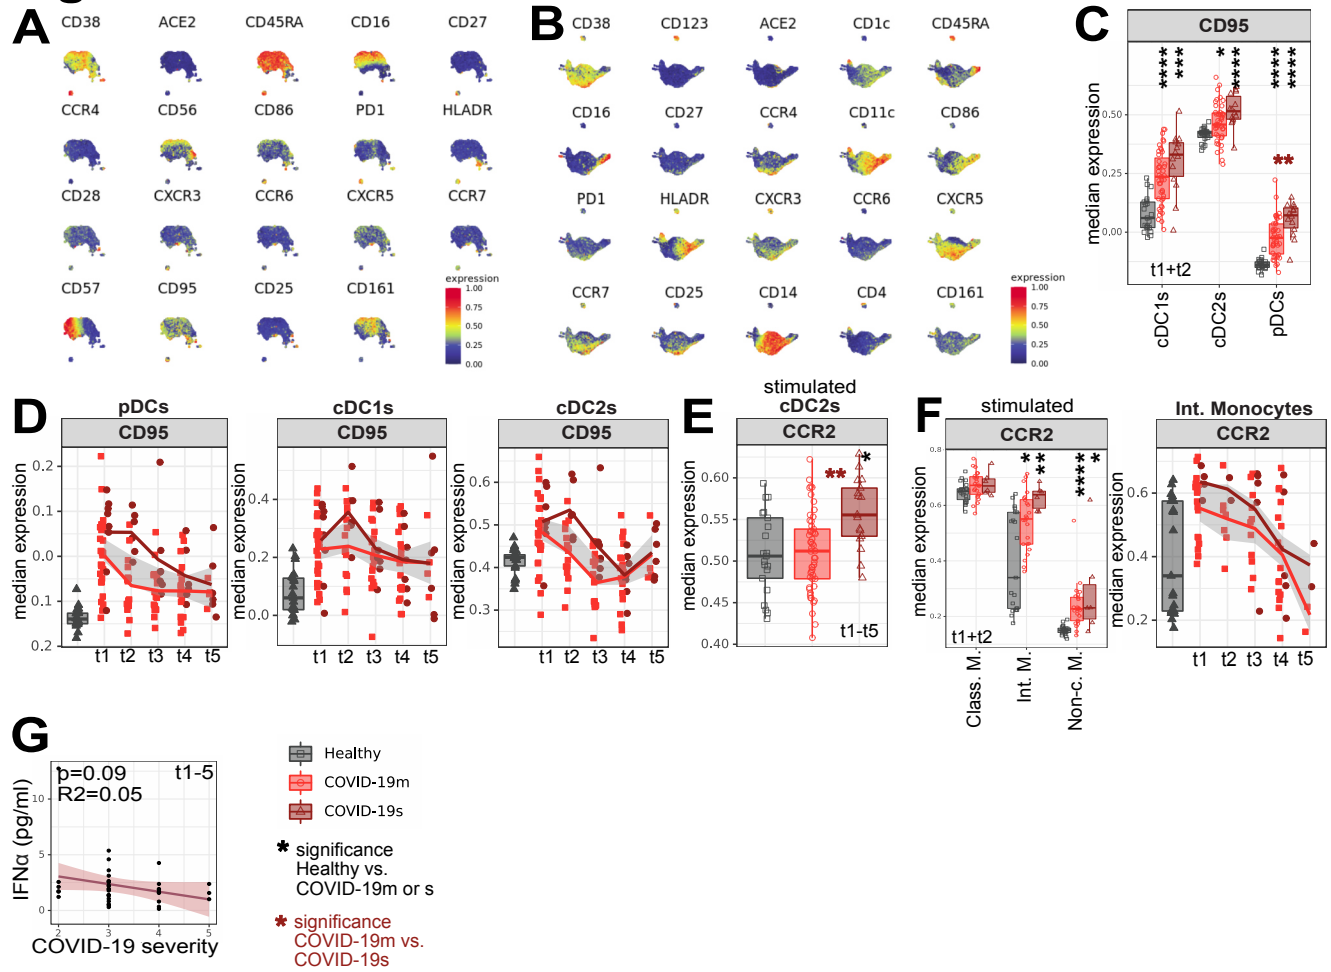

# Figure S4

**A**

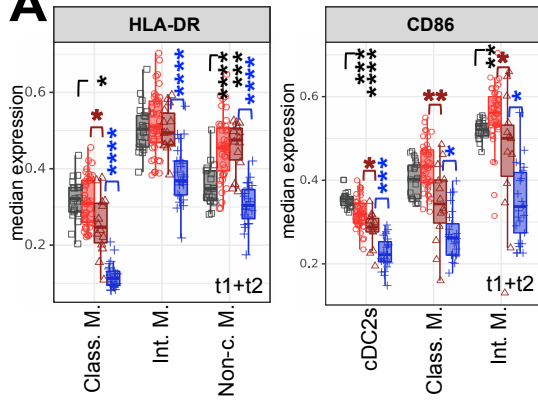

\* significance Healthy vs. COVID-19m or s  
 \* significance COVID-19m vs. COVID-19s  
 \* significance COVID-19s vs. HAP

**B**

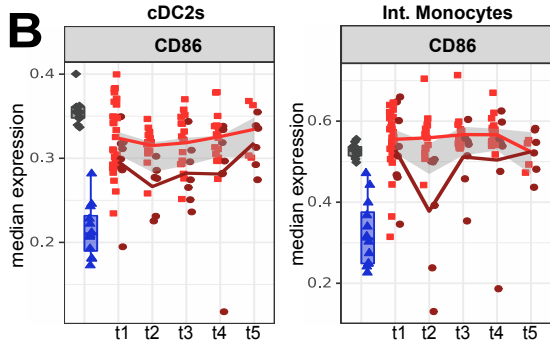

**C**

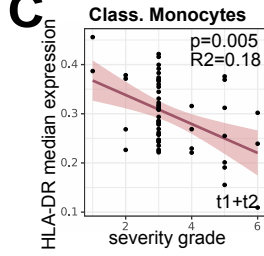

**D**

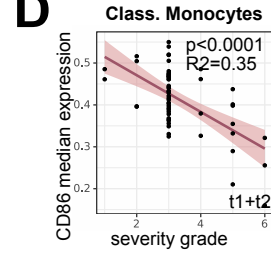

Healthy  
 COVID-19m  
 COVID-19s  
 HAP

# Figure S5

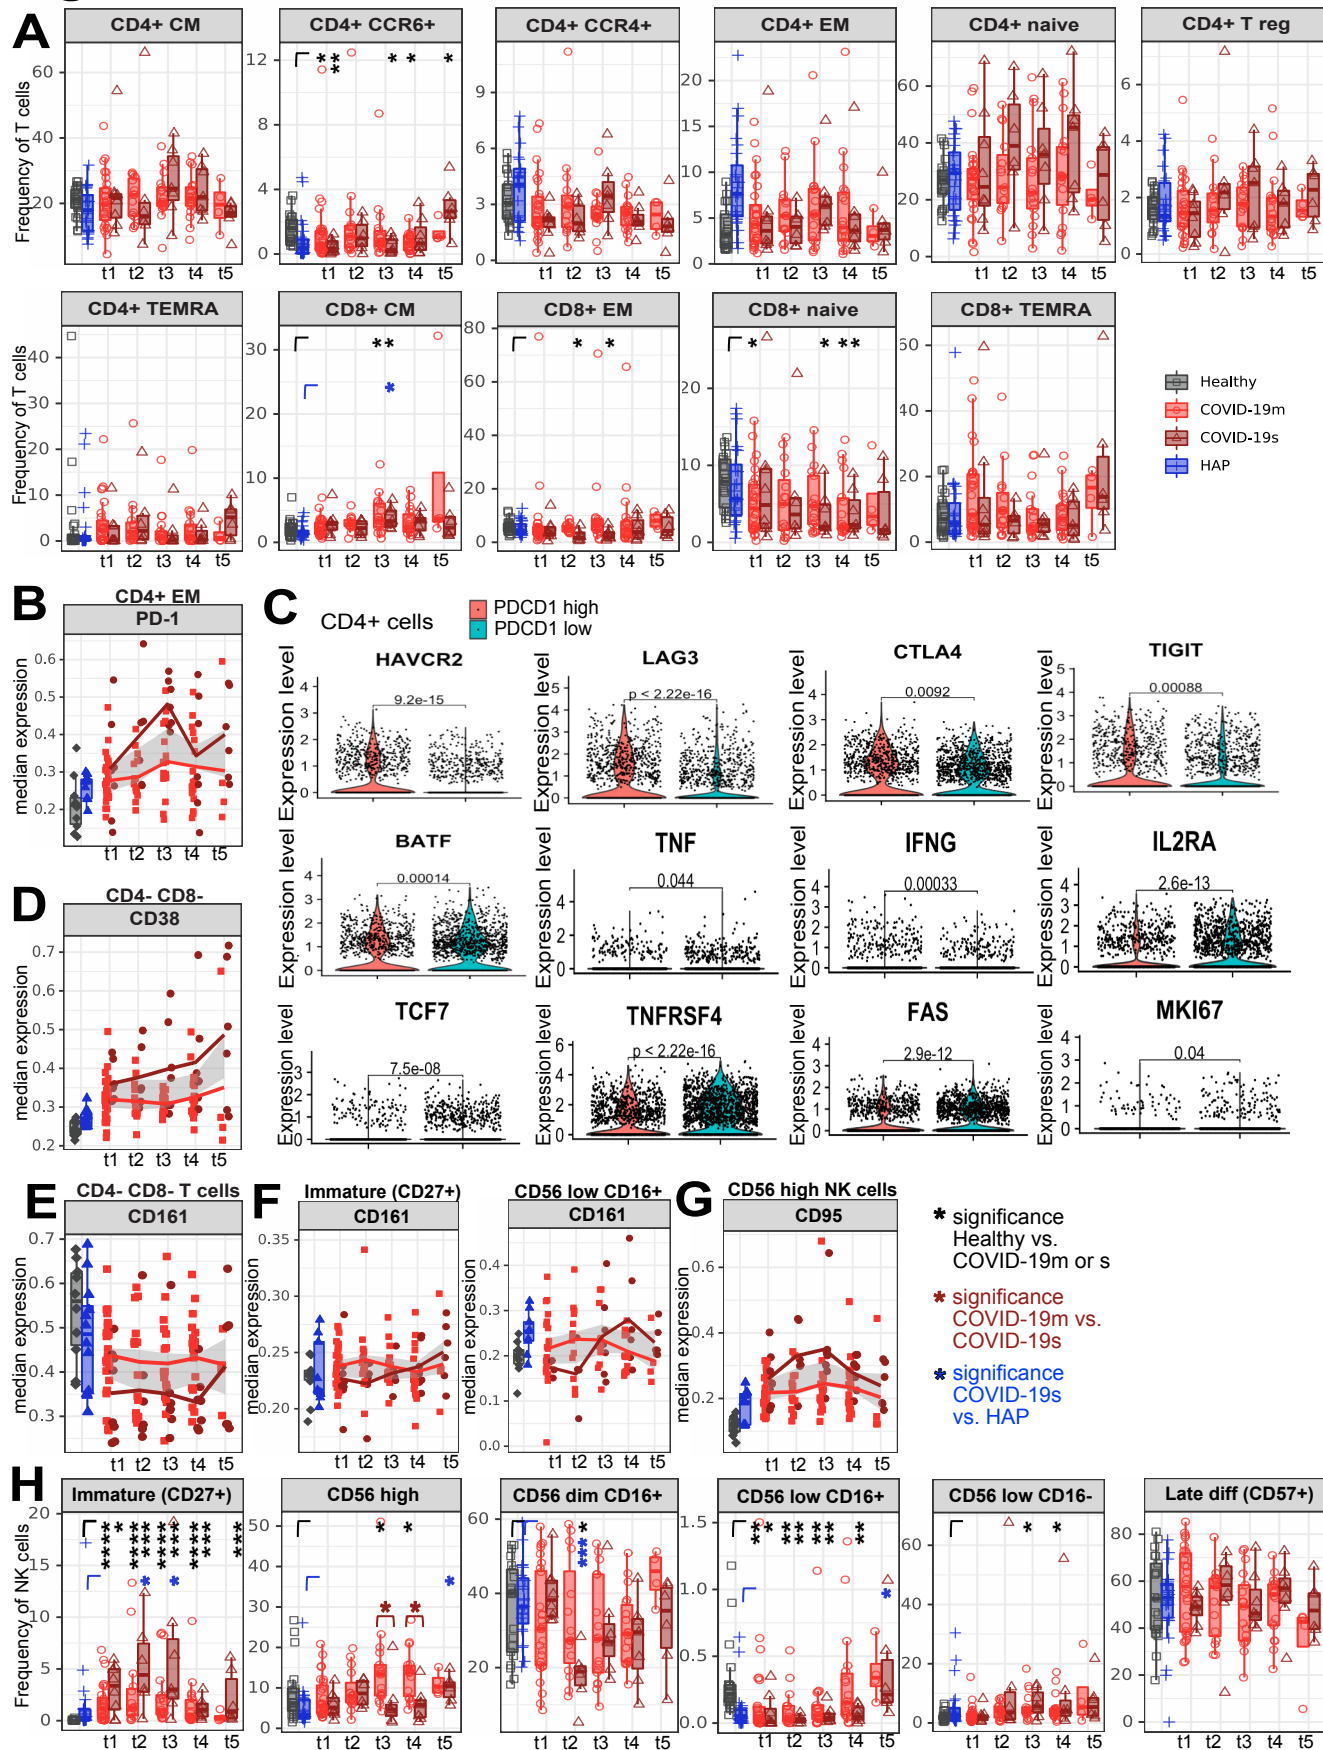

# Figure S6

**A**

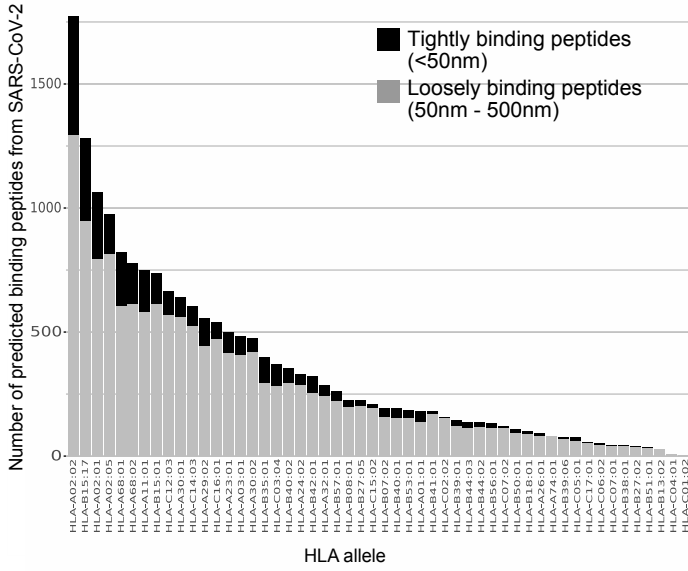

**B**

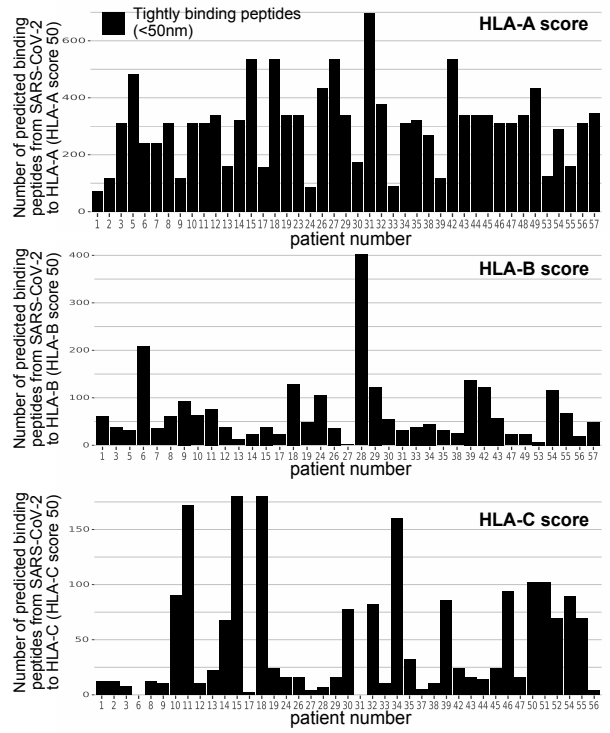

**C**

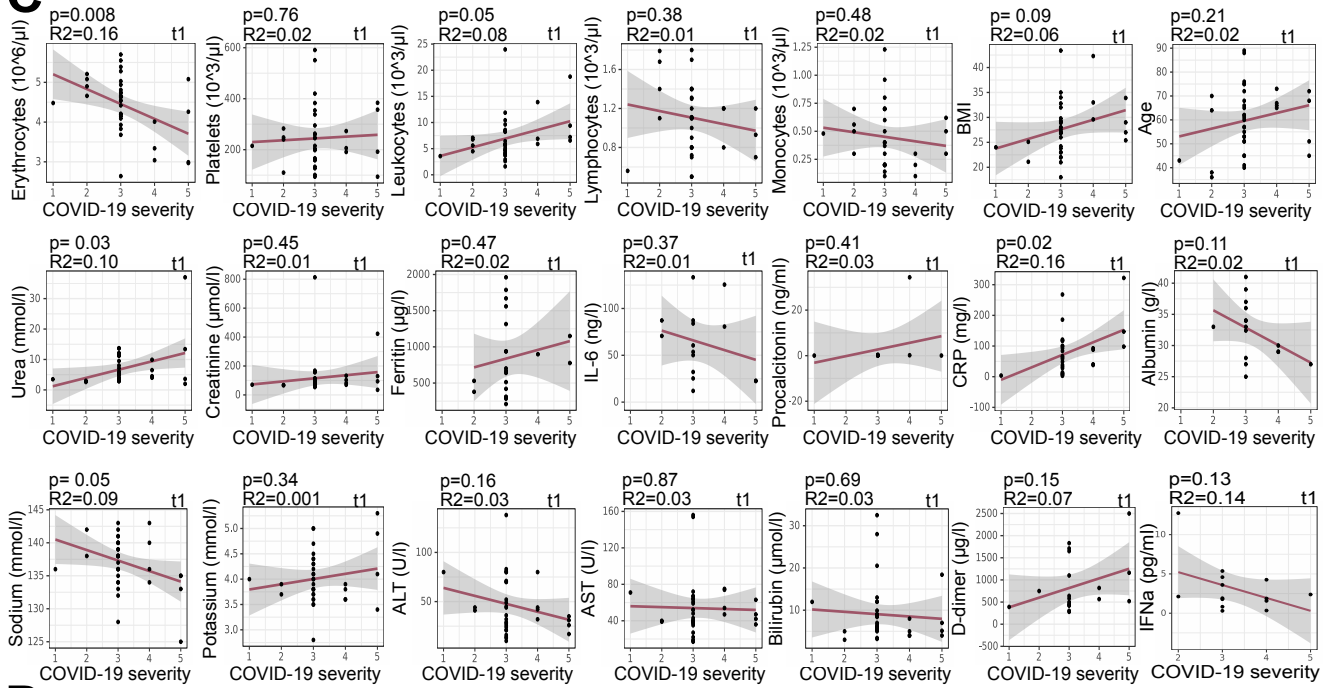

**D**

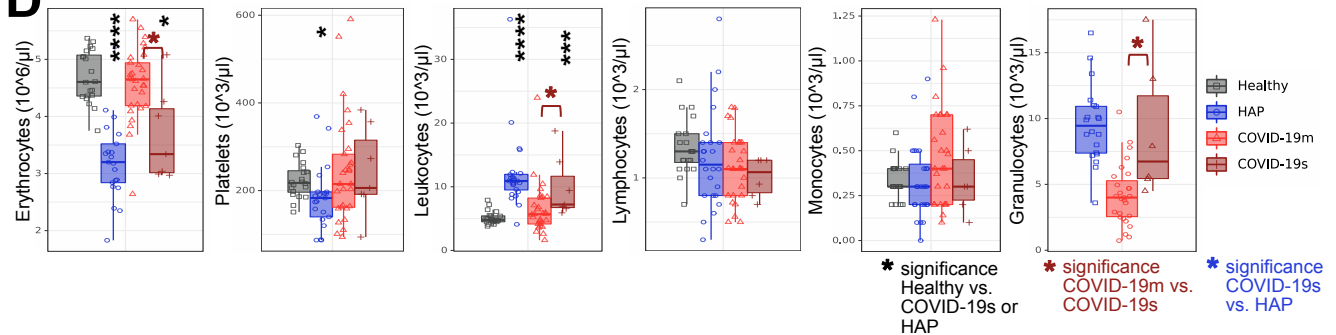

# Figure S7

## A

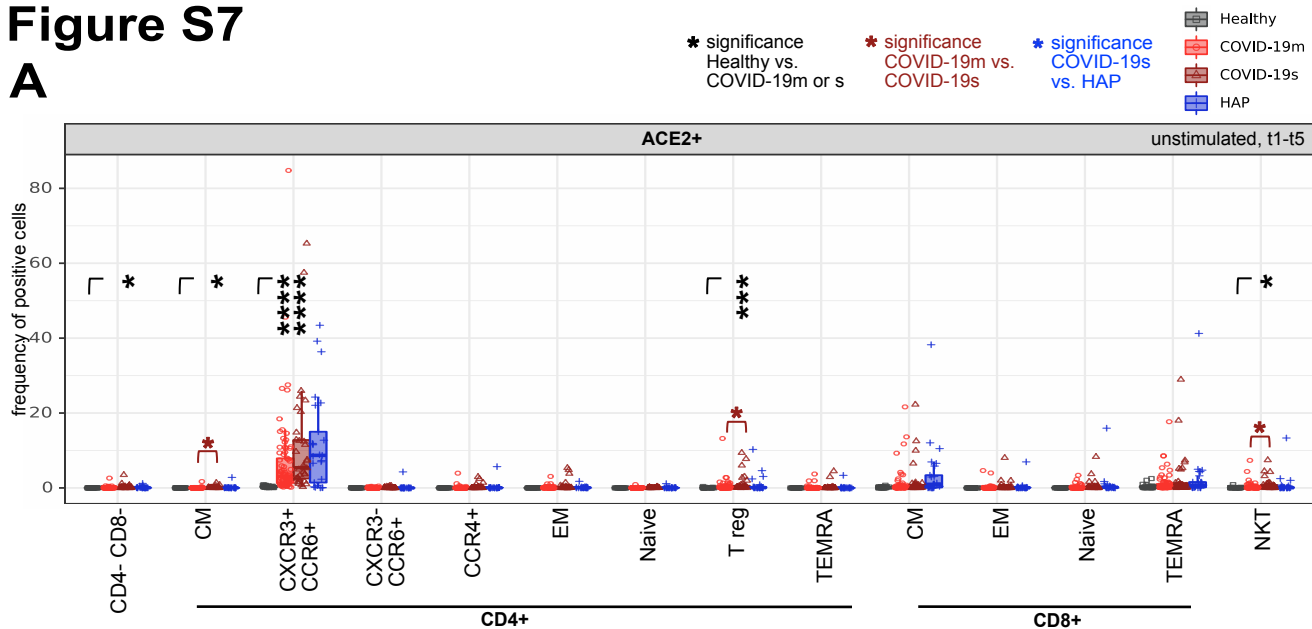

## B

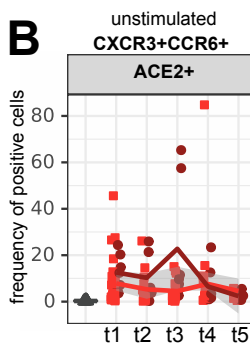

## C

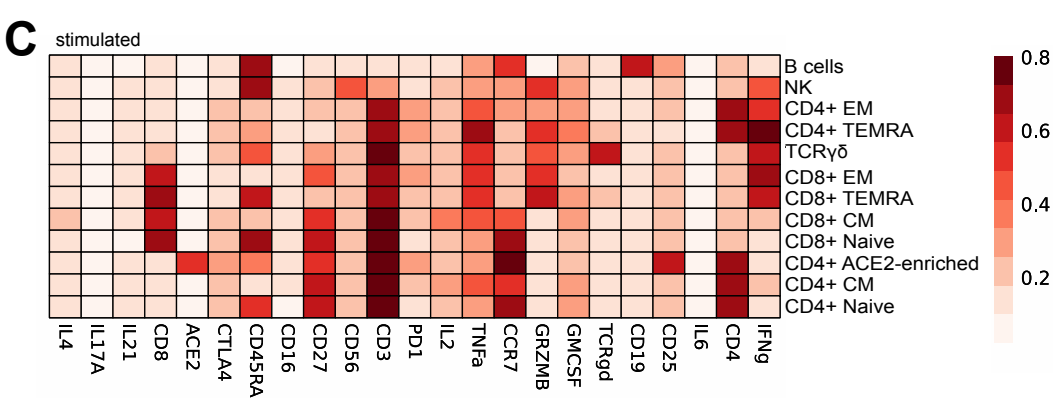

## D

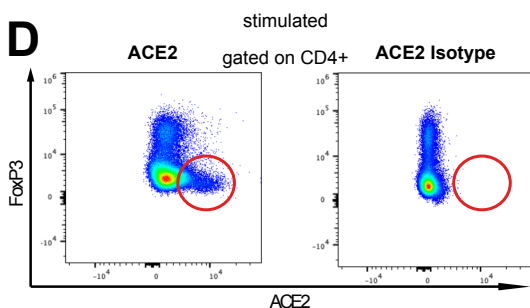

## E

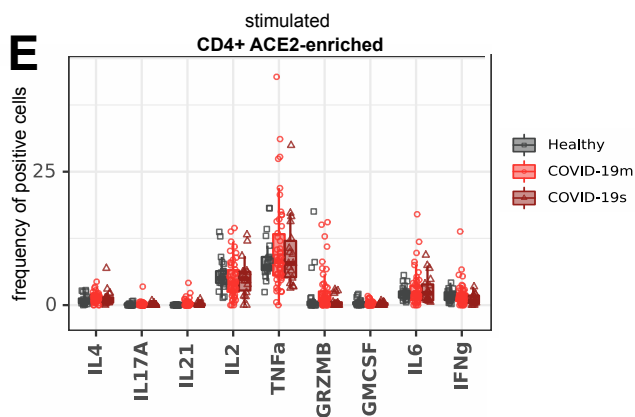



## **SUPPLEMENTAL FIGURE LEGENDS**

### **Figure S1 (referring to Figure 1)**

A: Schematic of experimental approach. Stated are the sample numbers from each cohort (COVID-19, HAP and HCs) before and after quality control, for every cytometry panel and in case of COVID-19 for every severity grade per TP.

B: UMAPs showing the total CD45<sup>pos</sup> compartment of combined samples. Individual plots are overlaid with the expression of included markers. 1000 cells were subsetted from every sample from each cohort.

C: Heatmap depicting median expression of various markers in FlowSOM-derived main population clusters.

D: Box plots depicting median frequencies and 25th and 75th percentile of FlowSOM-generated immune cell cluster. Significant p values are depicted using an asterisk (\* =  $p < 0.05$ , \*\* =  $p < 0.01$  and \*\*\* =  $p < 0.001$ , Mann-Whitney test, BH correction).

E: Principle Component (PC) analysis of the total immune compartment based on the markers used in the surface panel and stratified by the sample origin.

F: Principle Component (PC) analysis of the total immune compartment based on the markers used in the surface panel and stratified by sex.

G: Principle Component (PC) analysis of the total immune compartment based on the markers used in the surface panel and stratified by age.

### **Figure S2 (referring to Figure 2)**

A: UMAPs showing the total T cell compartment of combined samples. Individual plots are overlaid with the expression of included markers. 1000 cells were subsetted from every sample from each cohort.

B: Heatmap depicting median expression of relevant markers in FlowSOM-derived T cell clusters.

C: Median expression of PD-1 within indicated FlowSOM-generated T cell subsets of HCs shown in grey and of mild and severe COVID-19 patients across TPs 1-5 shown in red.

D: Box plots depicting median frequency and 25th and 75th percentile of CTLA-4 positive CD4<sup>+</sup> EM T cells of HCs, COVID-19m and COVID-19s patients. Data from all TPs were

pooled. Significant p values are depicted using an asterisk (\* =  $p < 0.05$ , Mann-Whitney test, BH correction).

E-J: Box plots depicting median frequency and 25th and 75th percentile of cytokine positive cells in indicated FlowSOM-generated T and NK cell subsets of HCs, COVID-19m and COVID-19s patients. Data from all TPs were pooled. Significant p values are depicted using an asterisk (\* =  $p < 0.05$ , \*\* =  $p < 0.01$ , \*\*\* =  $p < 0.001$  and \*\*\*\* =  $p < 0.0001$ , Mann-Whitney test, BH correction).

K: Box plots depicting frequency and 25th and 75th percentile of GM-CSF positive T cell subsets of HCs, COVID-19m and COVID-19s patients. Data from all TPs were pooled. Significant p values are depicted using an asterisk (\* =  $p < 0.05$ , \*\* =  $p < 0.01$  and \*\*\* =  $p < 0.001$ , Mann-Whitney test, BH correction).

L: Median frequency of GM-CSF positive cells within indicated FlowSOM-generated T cell subsets of HCs shown in grey and of COVID-19m and COVID-19s patients across TPs 1-5 shown in red.

M: Expression levels of *CSF2* (GM-CSF) in indicated cell subsets of COVID-19 patients measured by scRNA-seq.

N: Expression levels of indicated genes in *CSF2* (GM-CSF) high and low CD4<sup>+</sup> T cells of COVID-19 patients measured by scRNA-seq.

### **Figure S3 (referring to Figure 3)**

A: UMAPs showing the total NK cell compartment of combined samples. Individual plots are overlaid with the expression of included markers. 1000 cells were subsetted from every sample from each cohort.

B: UMAPs showing the total monocyte and DC compartment of combined samples. Individual plots are overlaid with the expression of included markers. 1000 cells were subsetted from every sample from each cohort.

C: Box plots depicting median expression and 25th and 75th percentile of CD95 in indicated FlowSOM-generated DC subsets. Data from TP 1 and 2 were pooled. Significant p values are depicted using an asterisk (\* =  $p < 0.05$ , \*\* =  $p < 0.01$ , \*\*\* =  $p < 0.001$  and \*\*\*\* =  $p < 0.0001$ , Mann-Whitney test, BH correction).

D: Median expression of CD95 within indicated cell subsets of HCs shown in grey and of COVID-19m and COVID-19s patients across TPs 1-5 shown in red.

E: Box plots depicting median expression and 25th and 75th percentile of CCR2 in FlowSOM-generated cDC2 subset after R848 restimulation. Data from all TPs were pooled. Significant p values are depicted using an asterisk (\* =  $p < 0.05$  and \*\* =  $p < 0.01$ , Mann-Whitney test, BH correction).

F: Box plots depicting median expression and 25th and 75th percentile of CCR2 in FlowSOM-generated monocyte subsets, combined for TP 1 and 2 (left panel) or displayed for every individual TP (right panel). Significant p values are depicted using an asterisk (\* =  $p < 0.05$ , \*\* =  $p < 0.01$  and \*\*\*\* =  $p < 0.0001$ , Mann-Whitney test, BH correction).

G: Correlation between IFN- $\alpha$  serum protein level against the severity grade of COVID-19 patients. All TPs were pooled.

#### **Figure S4 (referring to Figure 4)**

A: Box plots depicting median expression and 25th and 75th percentile of HLA-DR (left panel) and CD86 (right panel) in indicated FlowSOM-generated monocyte or DC subsets. Data from TP 1 and 2 were pooled. Significant p values are depicted using an asterisk (\* =  $p < 0.05$ , \*\* =  $p < 0.01$ , \*\*\* =  $p < 0.001$  and \*\*\*\* =  $p < 0.0001$ , Mann-Whitney test, BH correction).

B: Median expression of CD86 within cDC2s (left panel) or intermediate monocytes (right panel). Boxplot of HCs shown in grey, HAP in blue and COVID-19m and COVID-19s patients shown in red across TPs 1-5.

C: Correlation between median expression of HLA-DR in classical monocytes (TP 1 and 2 pooled) against the severity grade of COVID-19 patients.

D: Correlation between median expression of CD86 in classical monocytes (TP 1 and 2 pooled) against the severity grade of COVID-19 patients.

#### **Figure S5 (referring to Figure 5)**

A: Box plots depicting median frequency and 25th and 75th percentile of FlowSOM-generated T cell subsets. Significant p values are depicted using an asterisk (\* =  $p < 0.05$  and \*\* =  $p < 0.01$ , Mann-Whitney test, BH correction).

B: Median expression of PD-1 within FlowSOM-generated CD4<sup>+</sup> EM T cell subset. Boxplot of HCs shown in grey, HAP patients in blue and COVID-19m and COVID-19s patients across TPs 1-5 shown in red.

C: Expression levels of indicated genes in *PDCD1* (PD-1) high and low CD4<sup>+</sup> T cells of COVID-19 patients measured by scRNA-seq.

D: Median expression of CD38 within FlowSOM-generated CD4<sup>+</sup> CD8<sup>-</sup> (TCR $\gamma\delta$  enriched) T cell subset. Boxplot of HCs shown in grey, HAP patients in blue and COVID-19m and COVID-19s patients across TPs 1-5 shown in red.

E: Median expression of CD161 within FlowSOM-generated CD4<sup>+</sup> CD8<sup>-</sup> (TCR $\gamma\delta$  enriched) T cell subset. Boxplot of HCs shown in grey, HAP patients in blue and COVID-19m and COVID-19s patients across TPs 1-5 shown in red.

F: Median expression of CD161 within indicated FlowSOM-generated NK cell subsets. Boxplot of HCs shown in grey, HAP patients in blue and COVID-19m and COVID-19s patients across TPs 1-5 shown in red.

G: Median expression of CD95 within indicated FlowSOM-generated NK cell subsets. Boxplot of HCs shown in grey, HAP patients in blue and COVID-19m and COVID-19s patients across TPs 1-5 shown in red.

H: Box plots depicting median frequency and 25th and 75th percentile of FlowSOM-generated NK cell subsets. Significant p values are depicted using an asterisk (\* = p < 0.05, \*\* = p < 0.01, \*\*\* = p < 0.001 and \*\*\*\* = p < 0.0001, Mann-Whitney test, BH correction).

#### **Figure S6 (referring to Figure 6)**

A: Bar graph demonstrates the predicted number of binding peptides from SARS-CoV-2 per indicated HLA class I allele which occurred in our study population.

B: Bar graphs show the number of predicted tightly binding peptides from SARS-CoV-2 per indicated HLA class I gene (summarized from both alleles) calculated for each individual study patient. The resulting values are further called HLA-A, HLA-B or HLA-C score 50.

C: Correlation between indicated blood values (TP 1 only) as well as age and BMI against the severity grade of COVID-19 patients.

D: Box plots depicting median counts and 25th and 75th percentile of erythrocytes, platelets, leukocytes, lymphocytes, monocytes and granulocytes at TP 1. Significant p values are depicted using an asterisk (\* = p < 0.05, \*\*\* = p < 0.001 and \*\*\*\* = p < 0.0001, Mann-Whitney test, BH correction).

#### **Figure S7 (referring to Figure 7)**

A: Box plots depicting the median frequency and 25th and 75th percentile of ACE2 positive cells in indicated FlowSOM-generated T cell subsets. All TPs have been pooled. Significant p values are depicted using an asterisk (\* = p < 0.05, \*\*\* = p < 0.001 and \*\*\*\* = p < 0.0001, Mann-Whitney test, BH correction).

B: Median frequency of ACE2 positive cells within FlowSOM-generated CXCR3<sup>+</sup> CCR6<sup>+</sup> (Th1 Th17-enriched) CD4<sup>+</sup> T cell subset. Boxplot of HCs shown in grey and COVID-19m and COVID-19s patients across TPs 1-5 shown in red.

C: Complete heatmap depicting the median expression of various markers in FlowSOM-derived clusters of PMA and ionomycin stimulated (5h) samples.

D: Representative flow cytometry plot showing ACE2 and isotype staining (x axis) against FoxP3 staining (y axis) within the CD4<sup>+</sup> T cell compartment of PMA and ionomycin stimulated (5h) HC samples.

E: Box plots depicting the median frequency and 25th and 75th percentile of cytokine positive cells in FlowSOM-generated CD4<sup>+</sup> ACE2 enriched cluster after PMA and ionomycin stimulation (5h). All TPs have been pooled.
